# Supplementary material for: Astrocytes Increase ATP Exocytosis Mediated Calcium Signaling in Response to Microgroove Structures
Source: PubMed Central journal article supplement — Sci Rep. 2015 Jan 19;5:7847. doi: 10.1038/srep07847 (PMC4297955; doi:10.1038/srep07847), 2015-01-19
Supplement: srep07847-s1.pdf [file srep07847-s1.pdf]

## Supplementary Information

### **Astrocytes Increase ATP Exocytosis Mediated Calcium Signaling in Response to Microgroove Structures**

Ajay V. Singh<sup>1</sup>, Michael Raymond<sup>1</sup>, Fabiano Pace<sup>1</sup>, Anthony Certo<sup>1</sup>, Jonathan M. Zuidema<sup>1</sup>, Christopher A. McKay<sup>1</sup>, Ryan J. Gilbert<sup>1</sup>, X. Lucas Lu<sup>2</sup>, Leo Q. Wan<sup>1\*</sup>

<sup>1</sup>Department of Biomedical Engineering, Center for Biotechnology & Interdisciplinary Studies, Rensselaer Polytechnic Institute, Troy, New York 12180

<sup>2</sup>Department of Mechanical Engineering, Delaware University, Newark, DE 19716

\* Corresponding address:

Leo Q. Wan

110 8<sup>th</sup> street, Biotech 2147

Troy, NY 1280

Email: [wangq@rpi.edu](mailto:wangq@rpi.edu),

Phone: +1-518-276-2505

Fax: +1-518-276-3035

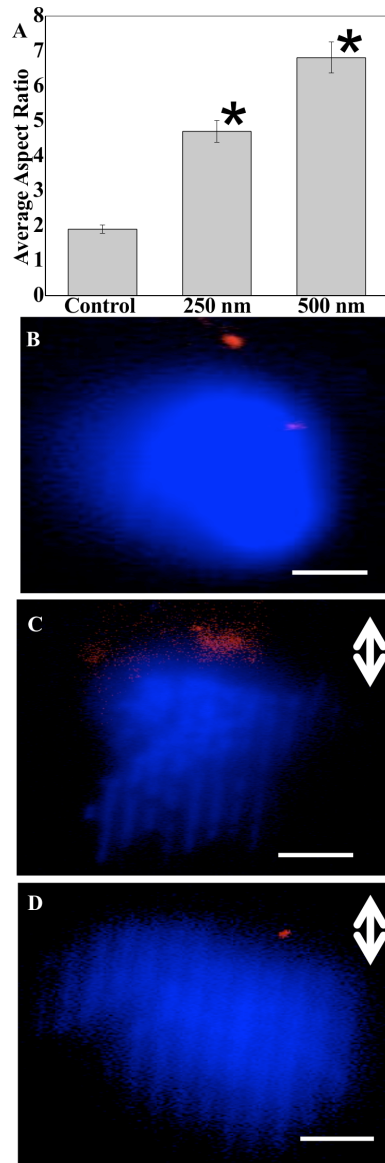

**Fig. S1** Quantitative morphological analysis and nucleus centrosome (NC) immunostaining. (A) Cell aspect ratio on control and patterned surfaces. (B-D) NC Polarity and orientation on flat (B) and patterned PDMS (C: 250 nm in depth, and D: 500 nm). Red dot show centrosome. Scale bars: 5  $\mu$ m, Double-sided arrows show grooves directions. \* stands for significant difference from the control.

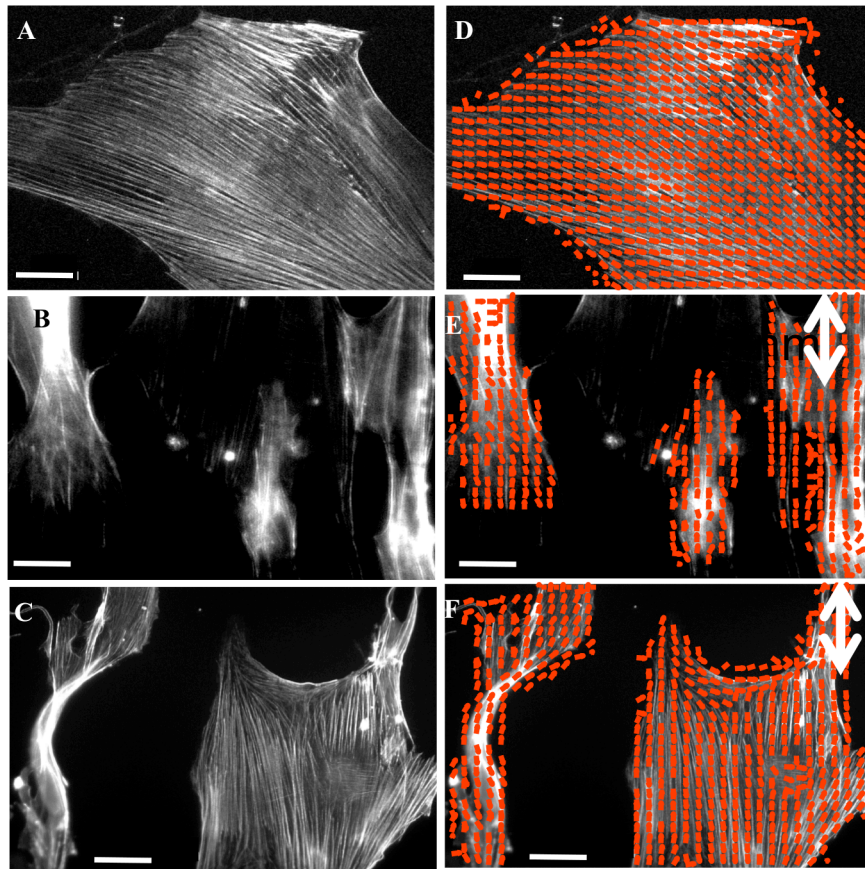

**Fig. S2** Actin stress fiber analyses. Overlaid red short lines show the orientation of actin stress fibers along microgroove on flat surface (A, D), 250 nm deep grooves (B, E), and 500 nm deep grooves (C,F). Scale Bars: 20  $\mu\text{m}$ .

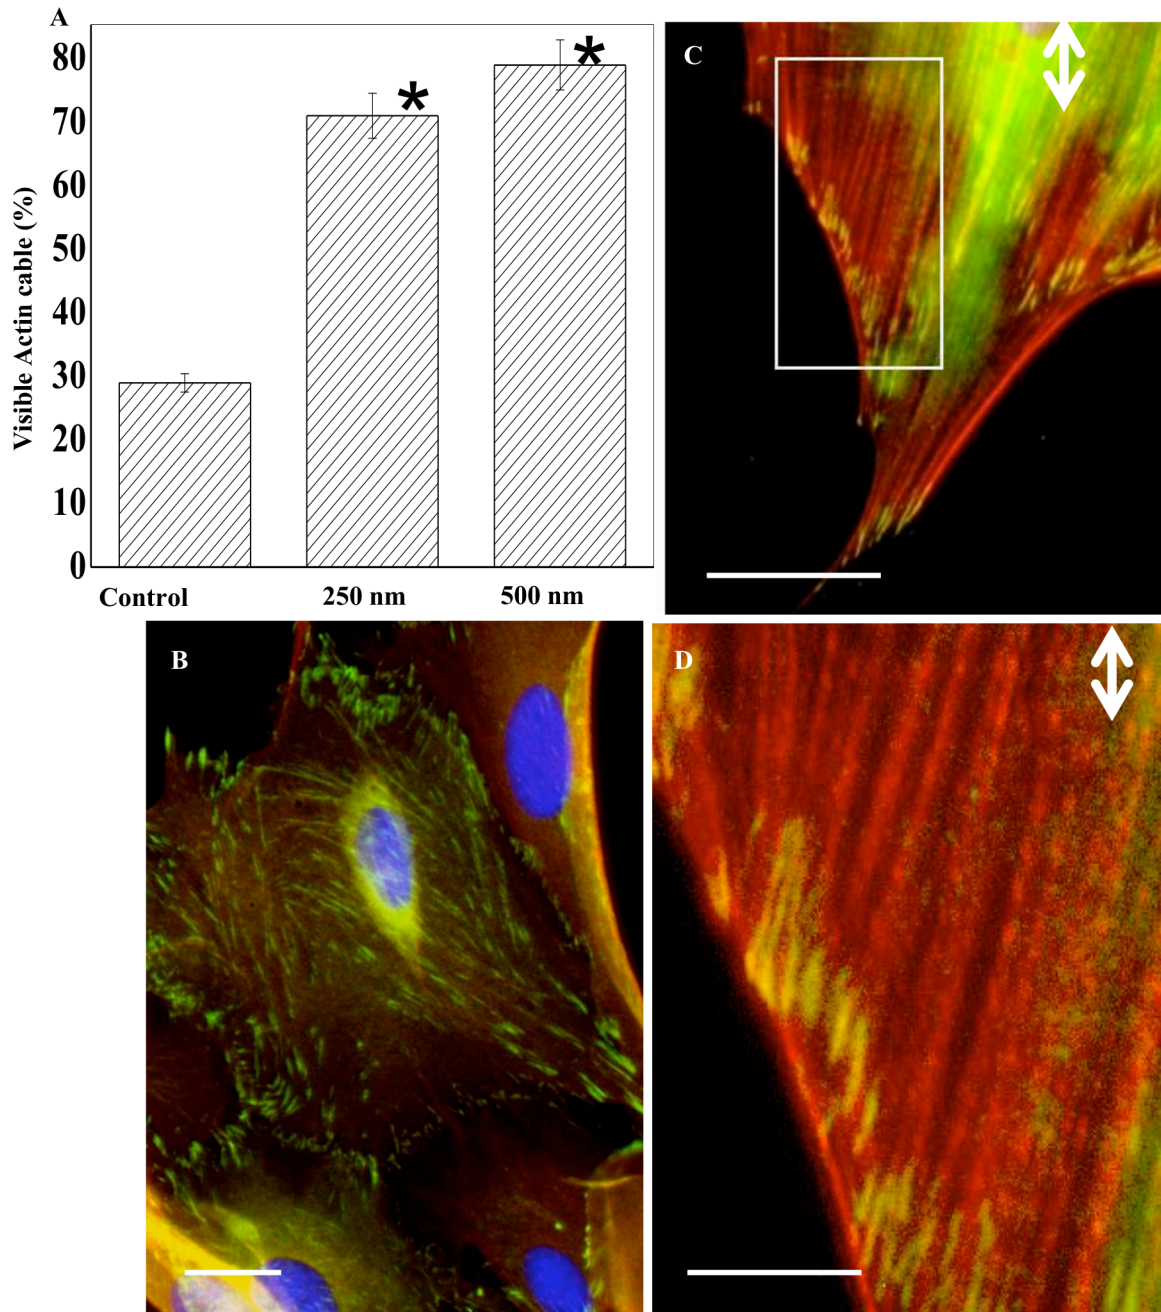

**Fig. S3** Qualitative and quantitative analysis of aligned actin filaments and focal adhesion complex (FACs). (A) Percentage of cells showing visible actin cables on micro-/nanopatterns (the number of analyzed cells  $n=25$ ).

(B-D) Actin (red) – vinculin (green) fluorescence images showing that different from the control group (B), actin cables are highly visible and terminate on vinculin-rich FACs spots (C-D) on pattern surfaces. Scale bars: 20  $\mu\text{m}$  in B & C, and 5  $\mu\text{m}$  in D. Double sided arrows indicate groove directions. \* stands for significant difference from the control.

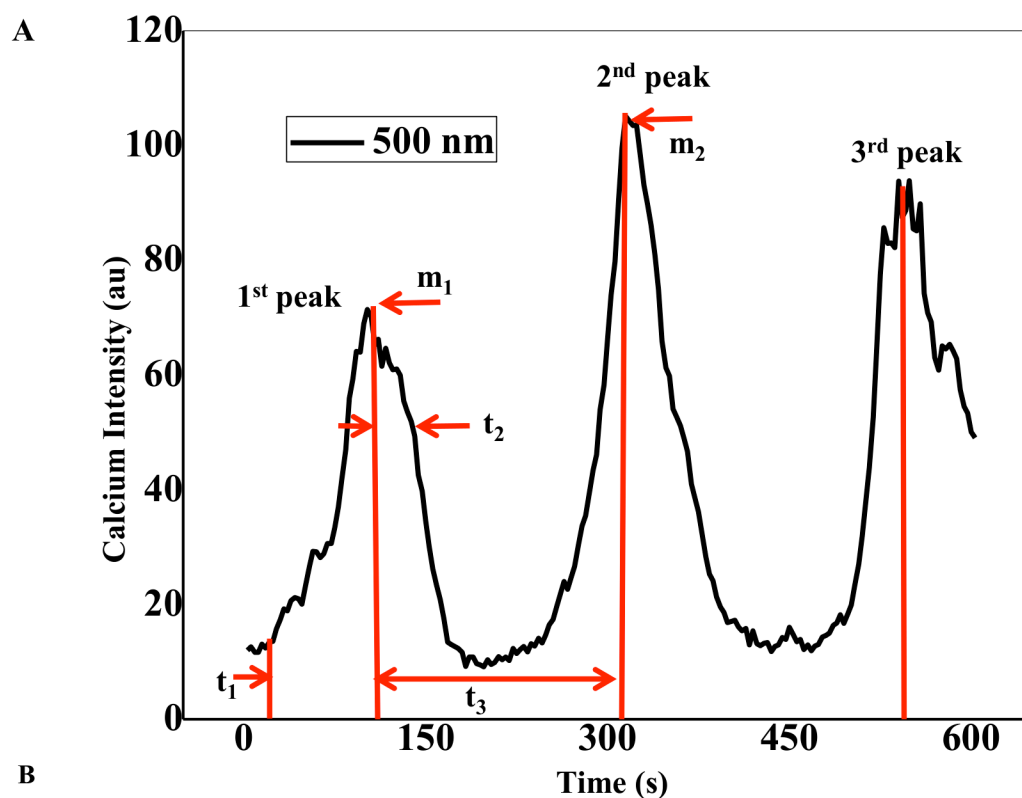

**B**

|         | $m_1$ (au)      | $m_2$ (au)      | $t_1$ (s)      | $t_2$ (s)     | $t_3$ (s)       |
|---------|-----------------|-----------------|----------------|---------------|-----------------|
| Control | $9.6 \pm 2.24$  | $9.6 \pm 2.24$  | $169 \pm 7.65$ | $81 \pm 3.59$ | $350 \pm 11.23$ |
| 250 nm  | $18.4 \pm 5.09$ | $33.8 \pm 2.81$ | $51 \pm 3.48$  | $28 \pm 4.52$ | $230 \pm 16.90$ |
| 500 nm  | $68 \pm 1.76$   | $99.4 \pm 2.55$ | $114 \pm 9.06$ | $58 \pm 2.11$ | $126 \pm 7.66$  |

**Fig. S4** Characteristics of intracellular  $[Ca^{2+}]_i$  oscillation of astrocytes on plat an grooved surfaces. (A) The  $[Ca^{2+}]_i$  intensity was represented by average fluorescence intensity inside a cell (normalized by baseline level). The analyzed parameters were also defined in the figure: magnitude of 1<sup>st</sup> peak  $m_1$ , magnitude of strongest peak  $m_2$ , time to 1<sup>st</sup> peak  $t_1$ , relaxation time of 1<sup>st</sup> peak  $t_2$ , and time interval between two neighboring peaks  $t_3$ . (B) Characteristics of intracellular  $[Ca^{2+}]_i$  oscillation on unpatterned and patterned surfaces. Data was shown as mean  $\pm$  standard deviation.

**Supporting movie SM1.** Calcium releasing events of the astrocytes immediately after seeded onto unpatterned PDMS. The video was taken at a rate of 3 seconds per frame for a total of 10 minutes.

**Supporting movie SM2.** Calcium releasing events of the astrocytes immediately after seeded onto 250 nm deep PDMS. The video was taken at a rate of 3 seconds per frame for a total of 10 minutes.

**Supporting movie SM3.** Calcium releasing events of the astrocytes immediately after seeded onto 500 nm deep PDMS. The video was taken at a rate of 3 seconds per frame for a total of 10 minutes.
